# Supplementary material for: Revealing the role of dopants in mitigating degradation phenomena in sodium-ion layered cathodes
Source: Royal Society of Chemistry journal article supplement (doi:10.1039/d0cp04974c), 2021-01-01
Supplement: d0cp04974c1.pdf [file d0cp04974c1.pdf]

## Supporting Information

### Revealing the Role of Dopants in Mitigating Degradation Phenomena in Sodium-Ion Layered Cathodes

Kyoungmin Min<sup>1,\*</sup> and Young-Han Shin<sup>2,\*</sup>

<sup>1</sup>School of Mechanical Engineering, Soongsil University, 369 Sangdo-ro, Dongjak-gu, Seoul 06978,  
Republic of Korea

<sup>2</sup>Department of Physics, University of Ulsan, 93 Daehak-ro, Nam-gu, Ulsan 44610, Republic of  
Korea

| <b>O3-type</b> | <b>Lattice <math>a</math> (Å)</b> | <b>Lattice <math>c</math> (Å)</b> | <b>Volume (Å<sup>3</sup>/f.u.)</b> |
|----------------|-----------------------------------|-----------------------------------|------------------------------------|
| Pristine       | 3.01                              | 15.95                             | 124.86                             |
| Mg-doped       | 3.01                              | 16.01                             | 125.35                             |
| Ti-doped       | 2.99                              | 15.94                             | 124.49                             |

Table S.1. The initial lattice parameters and volume for pristine and doped structures.

| <b>Structure</b> | <b>Atomic charge variation (<math>\Delta e</math>)</b> |           |           |          |               |
|------------------|--------------------------------------------------------|-----------|-----------|----------|---------------|
|                  | <b>Ni</b>                                              | <b>Co</b> | <b>Mn</b> | <b>O</b> | <b>Dopant</b> |
| Pristine         | 0.1013                                                 | 0.0538    | 0.0190    | 0.3984   | n/a           |
| Mg-doped         | 0.0895                                                 | 0.0634    | 0.0150    | 0.3927   | 0.0069        |
| Ti-doped         | 0.1029                                                 | 0.0693    | 0.0180    | 0.3636   | 0.0155        |

Table S.2. Atomic charge variation for each element after full desodiation in pristine and doped structures.
